# Supplementary material for: Yogurt Alleviates Cyclophosphamide-Induced Immunosuppression in Mice through D-Lactate
Source: MDPI journal article supplement (doi:10.3390/nu16091395), 2024-05-06
Supplement: s1 [file s1]

## Supplementary Materials

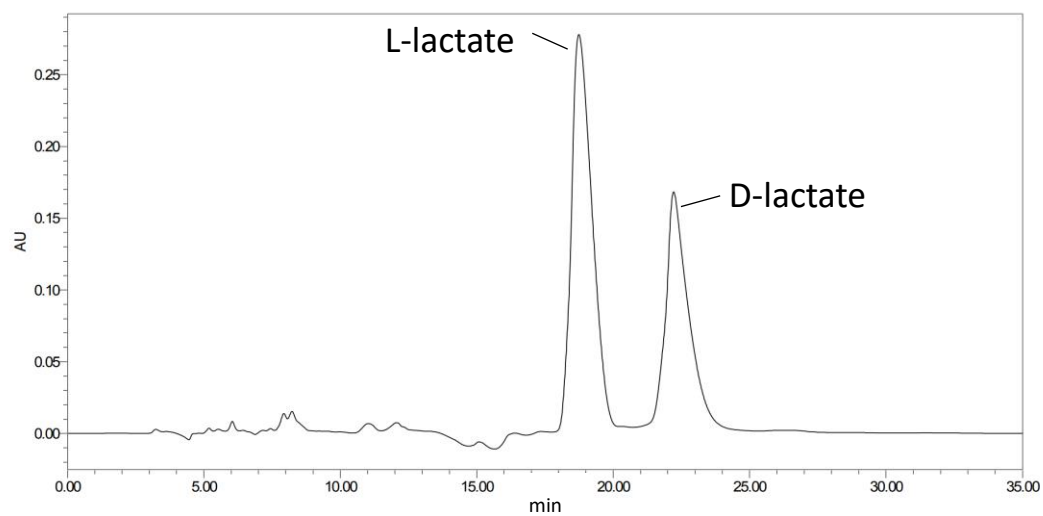

**Figure S1.** The chromatogram of lactate concentration in simulated commercial yogurt detected by high-performance liquid chromatography (HPLC).

**Table S1.** The lactate concentration in simulated commercial yogurt.

| Ingredients   | Lactate Content (mg/mL) | Lactate Ratio (%) |
|---------------|-------------------------|-------------------|
| D-lactate     | 5.90±0.02               | 0.57±0.02         |
| L-lactate     | 9.53±0.03               | 0.93±0.03         |
| Total lactate | 15.43±0.01              | 1.50±0.01         |

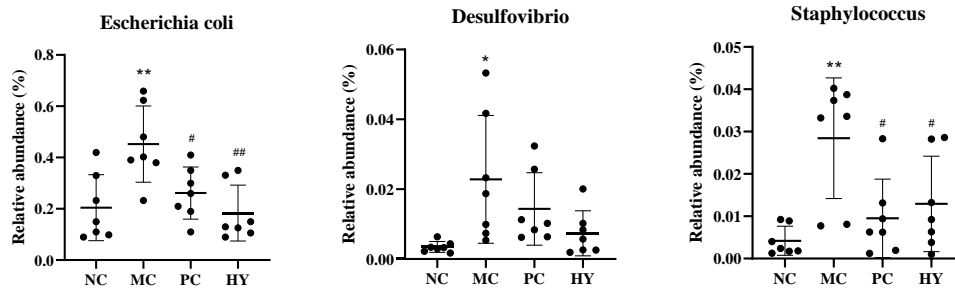

**Figure S2.** The relative abundance of *Escherichia coli*, *Desulfovibrio* and *Staphylococcus* in the fecal of CTX-induced mice. Statistical significance was evaluated by performing a one-way ANOVA followed by the Tukey test on the values presented as mean  $\pm$  SEM. \* $p < 0.05$ , \*\* $p < 0.01$ , \*\*\* $p < 0.001$  vs. normal control group (NC). # $p < 0.05$ , ## $p < 0.01$ , ### $p < 0.001$  vs. model control group (MC).

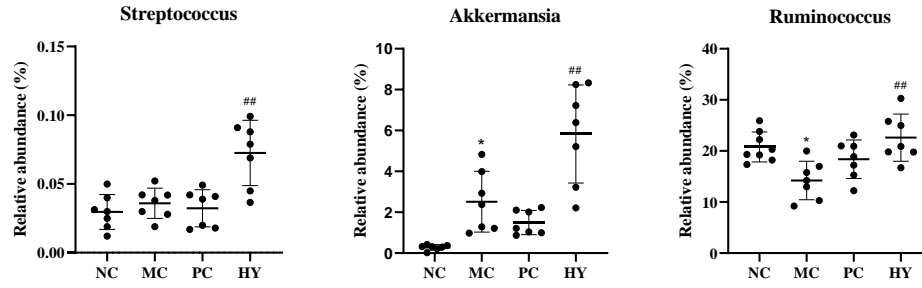

**Figure S3.** The relative abundance of *Streptococcus*, *Akkermansia* and *Ruminococcus* in the fecal of CTX-induced mice. Statistical significance was evaluated by performing a one-way ANOVA followed by the Tukey test on the values presented as mean  $\pm$  SEM (n = 10). \* $p$  < 0.05, \*\* $p$  < 0.01, \*\*\* $p$  < 0.001 vs. normal control group (NC). # $p$  < 0.05, ## $p$  < 0.01, ### $p$  < 0.001 vs. model control group (MC).
